# Supplementary material for: Mobile health apps for cardiovascular risk assessment: a systematic review
Source: PubMed Central journal article supplement (PMC11456540; doi:10.3389/fcvm.2024.1420274), 2024-09-23
Supplement: Table1.pdf [file Table1.pdf]

**SUPPLEMENTARY MATERIAL**
**Table Supplementary 1.** Reason of excluded mhealth apps.

| <b>App name</b>                           | <b>Platform</b> | <b>Developer</b>                                         | <b>Reason for exclusion</b>                                 |
|-------------------------------------------|-----------------|----------------------------------------------------------|-------------------------------------------------------------|
| CardioVisual: Heart Health                | IOS/Android     | MedicalVisual, Inc                                       | Did not open                                                |
| Riesgo Cardiovascular App                 | Android         | Niriom                                                   | Did not open                                                |
| Test del Corazón – calculadora del riesgo | IOS             | Pears Health Cyber s.r.o.                                | Did not comply with a risk scoring system                   |
| CURRENT Dx Tx Cardiology                  | IOS/Android     | Skyscape Medpresso Inc                                   | It did not measure cardiovascular risk. Educational purpose |
| Riesgo Cardiovascular UMariana            | Android         | Niriom                                                   | Did not open, required an institutional account             |
| Goldman Cardiac Risk                      | IOS             | DOCTOT                                                   | Uses "Goldman Cardiac Risk"                                 |
| Test del Corazón-calculadora del riesgo   | IOS             | Pears Health Cyber s.r.o.                                | Did not comply with a validated risk scoring system         |
| My Heart Risk                             | IOS/Android     | Creighton University                                     | Did not open                                                |
| EPI.RxISK                                 | IOS             | University of Alberta                                    | Uses "Alberta Vascular Risk Reduction Community Project"    |
| DM2 360°                                  | IOS             | Boehringer Ingelheim Pharma GmbH & <a href="#">Co.KG</a> | Uses a different score not specified                        |
| Lipid manager                             | IOS/Android     | American College of Cardiology Foundation                | Duplicated                                                  |
| NLA ASCVD Risk Assessment Tool            | IOS             | The National Lipid Association                           | It did not measure cardiovascular risk. Educational purpose |
